# Supplementary material
Source: PubMed Central journal article supplement (PMC6897304)
Supplement: NIHMS1059721-supplement-Data.pdf [file NIHMS1059721-supplement-Data.pdf]

## Supplemental Data: Related to “Synthesis of DPP and FP Substrate Analogue Inhibitors” Spectroscopic and Spectrometric Characterization of Compounds

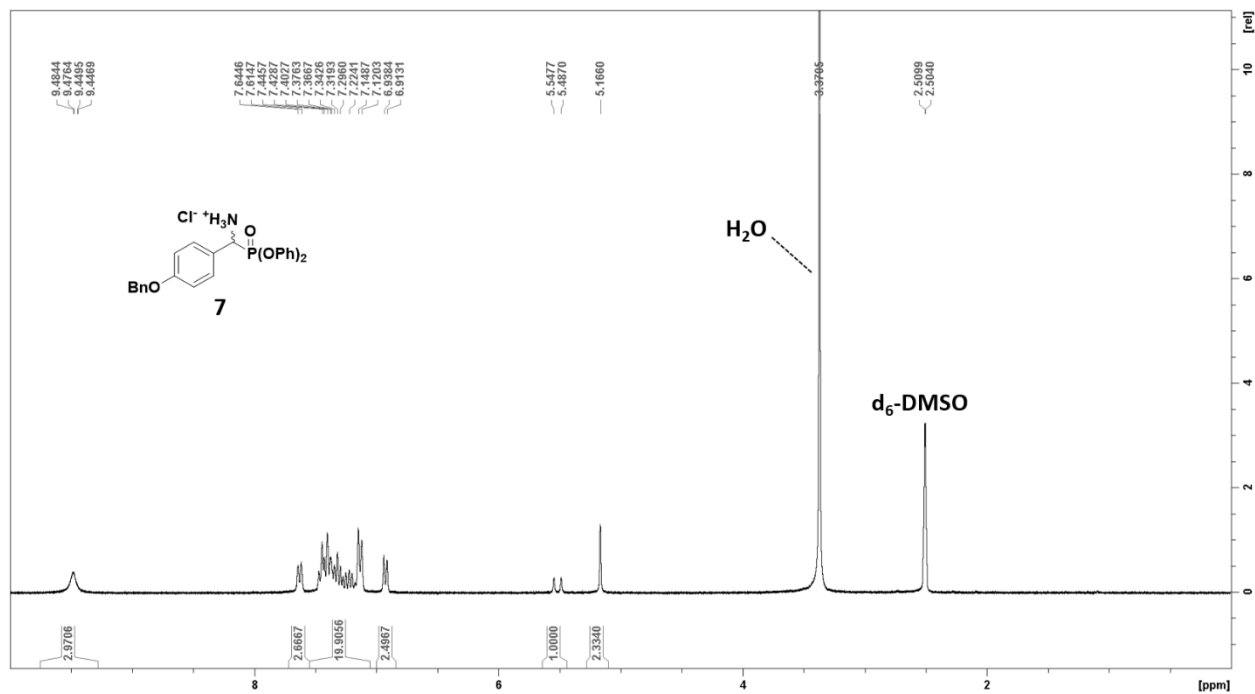

<sup>1</sup>H NMR spectrum of 7 in d<sub>6</sub>-DMSO.

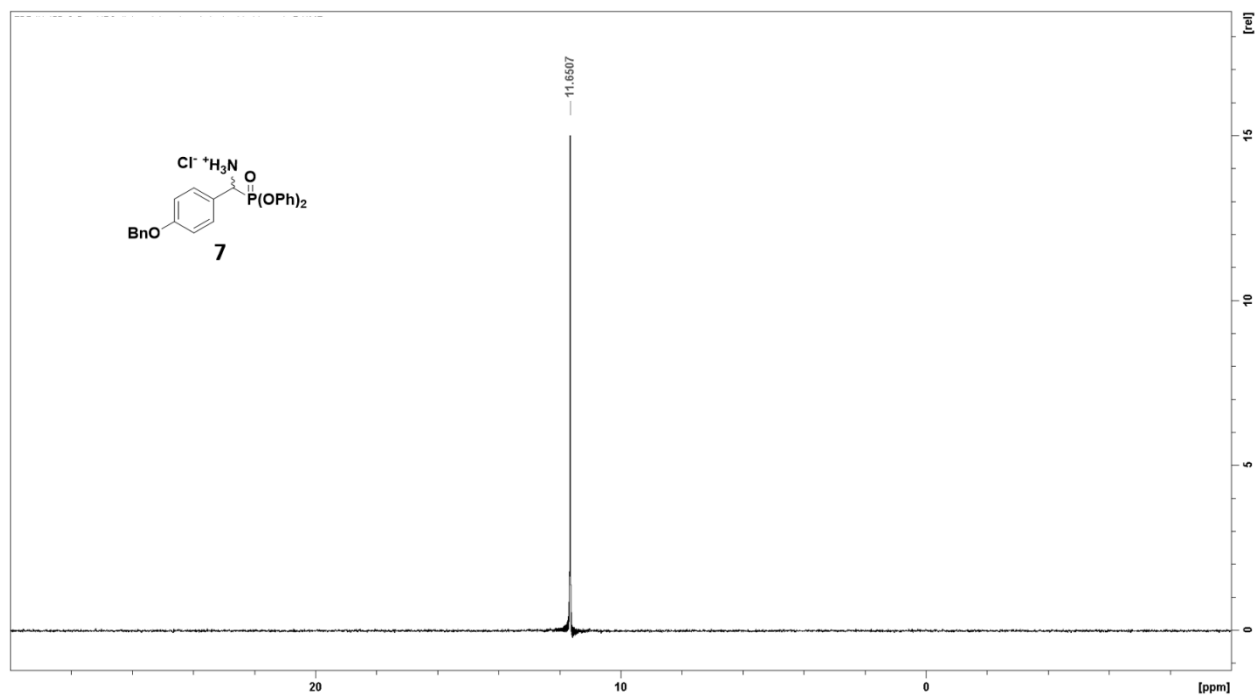

<sup>31</sup>P NMR spectrum of 7 in d<sub>6</sub>-DMSO.

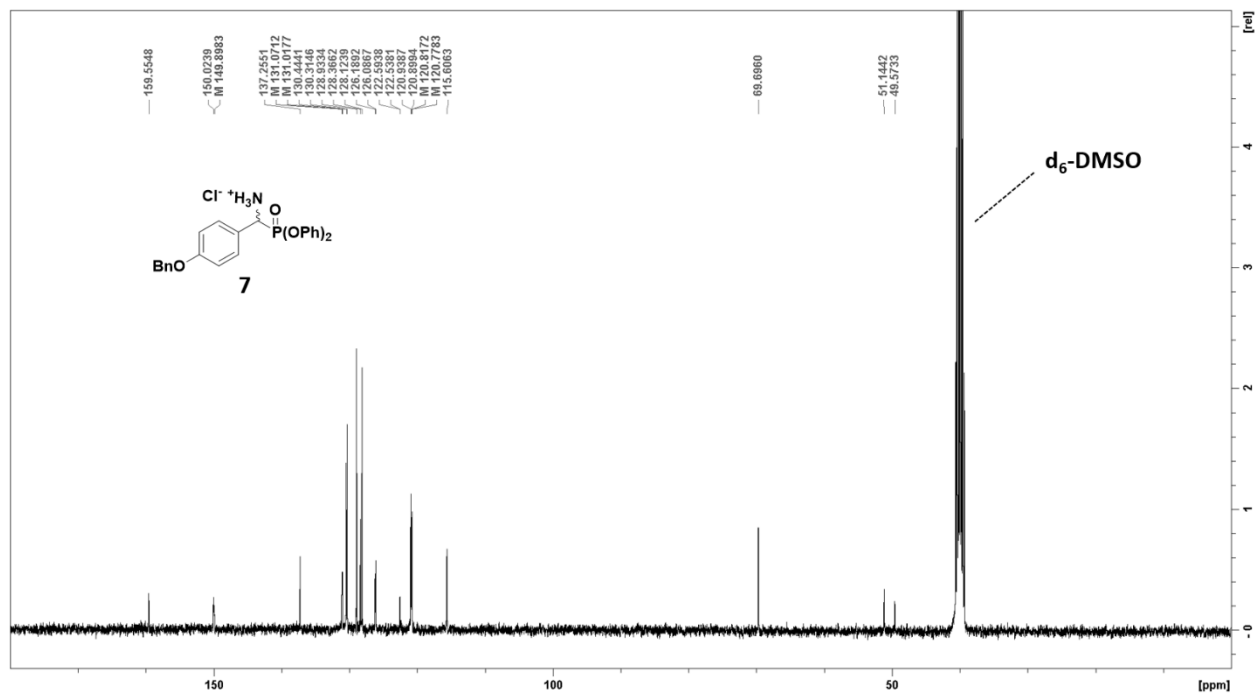

<sup>13</sup>C NMR of 7 in d<sub>6</sub>-DMSO.

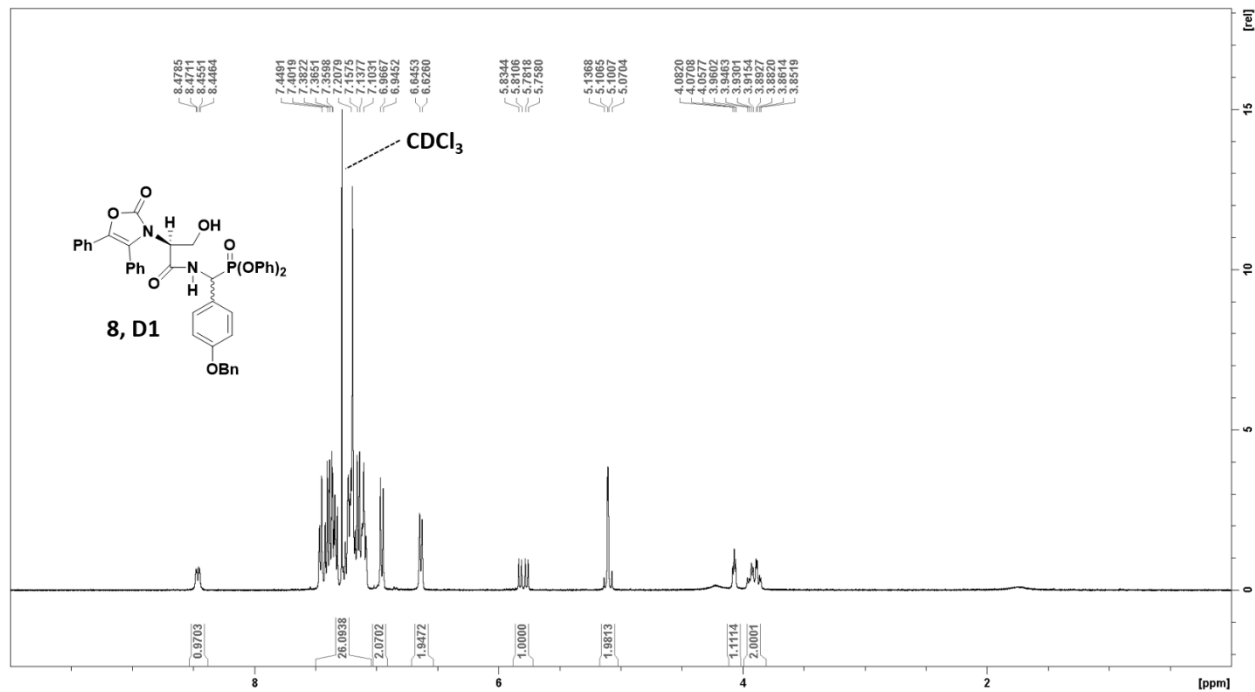

<sup>1</sup>H NMR of 8, diastereomer 1 (D1) in CDCl<sub>3</sub>.

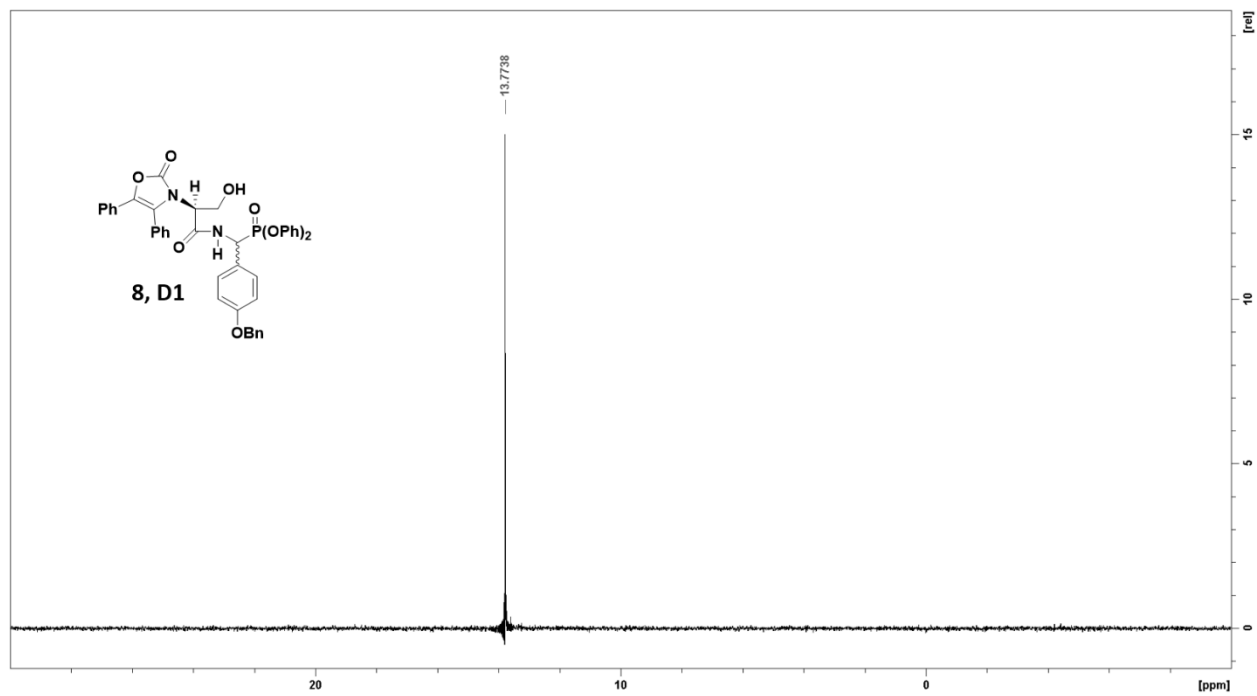

$^{31}\text{P}$  NMR of **8**, diastereomer 1 (D1) in  $\text{CDCl}_3$ .

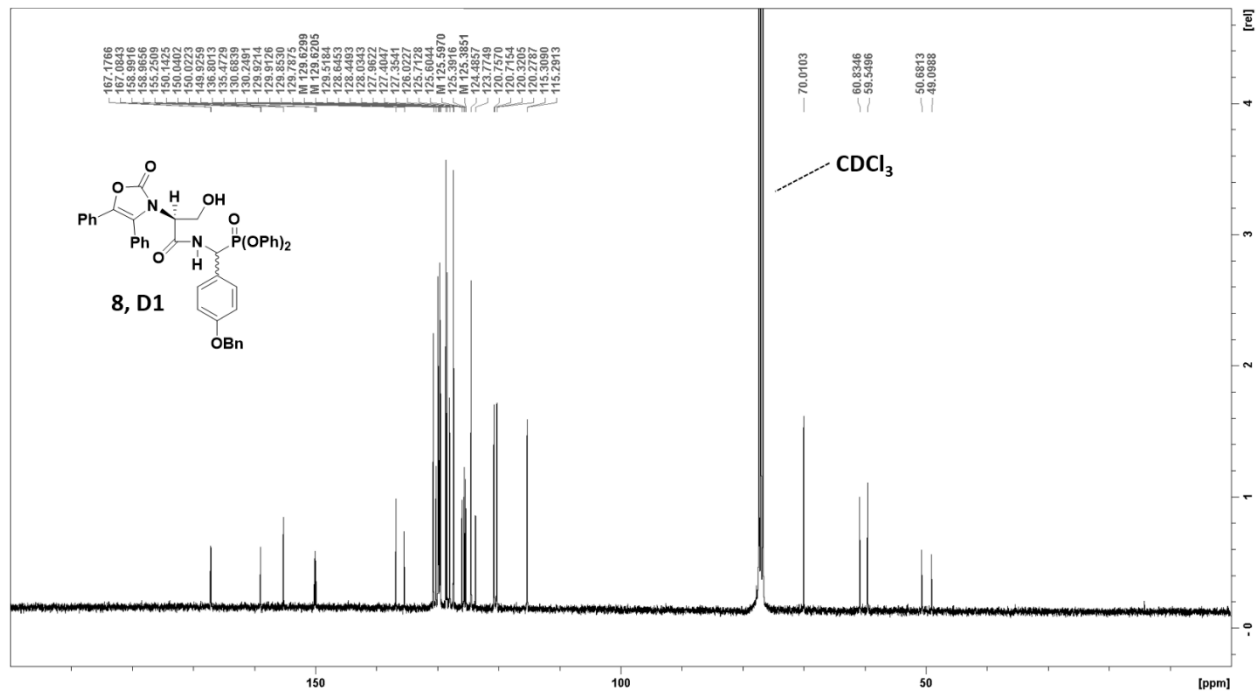

$^{13}\text{C}$  NMR of **8**, diastereomer 1 (D1) in  $\text{CDCl}_3$ .

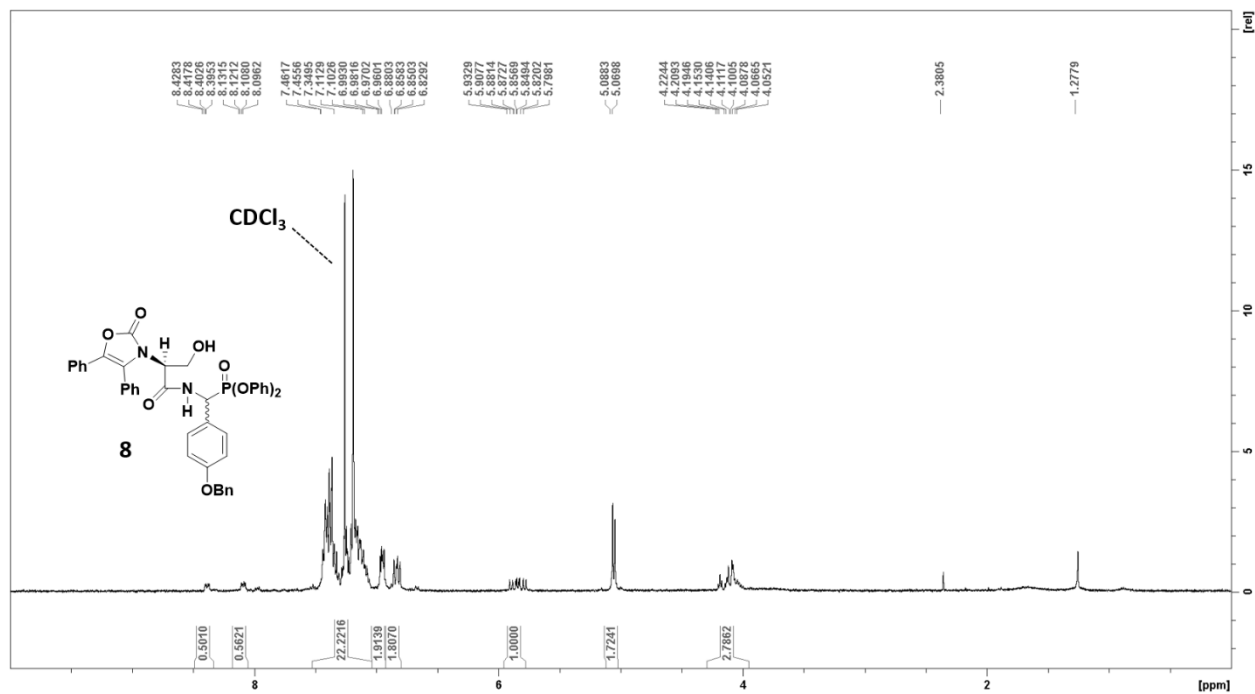

<sup>1</sup>H NMR of **8** (~1:1 mixture of diastereomers 1 and 2) in CDCl<sub>3</sub>.

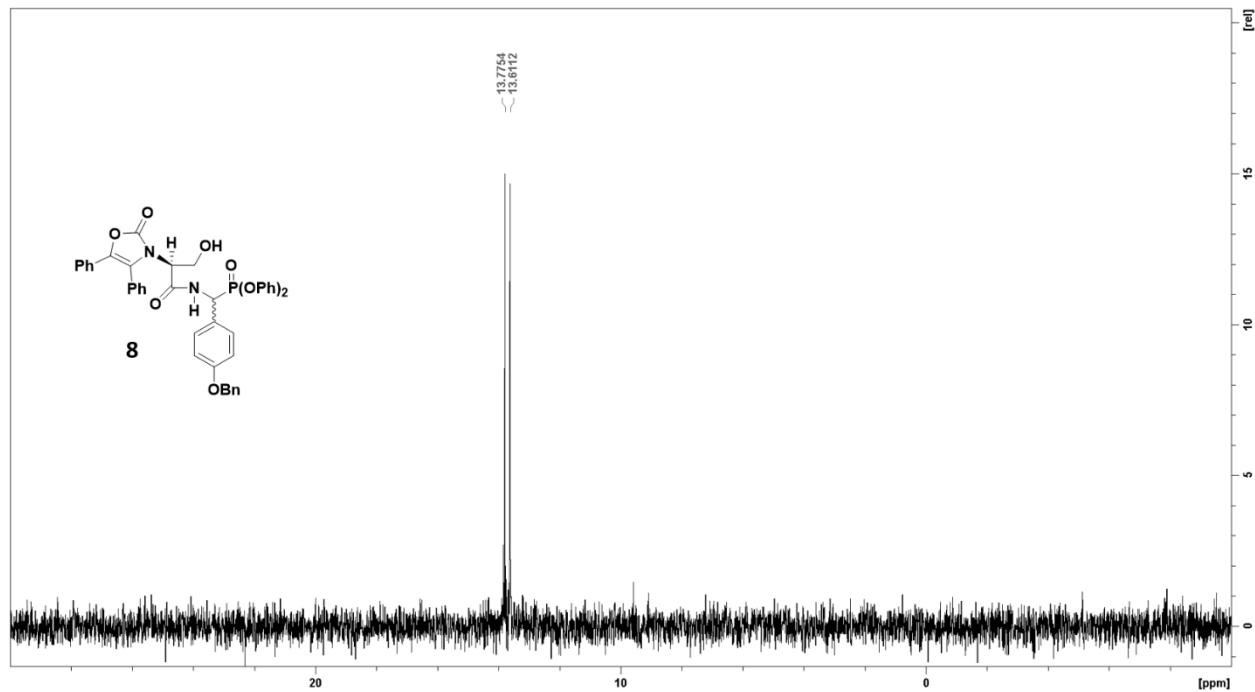

<sup>31</sup>P NMR of **8** (~1:1 mixture of diastereomers 1 and 2) in CDCl<sub>3</sub>.

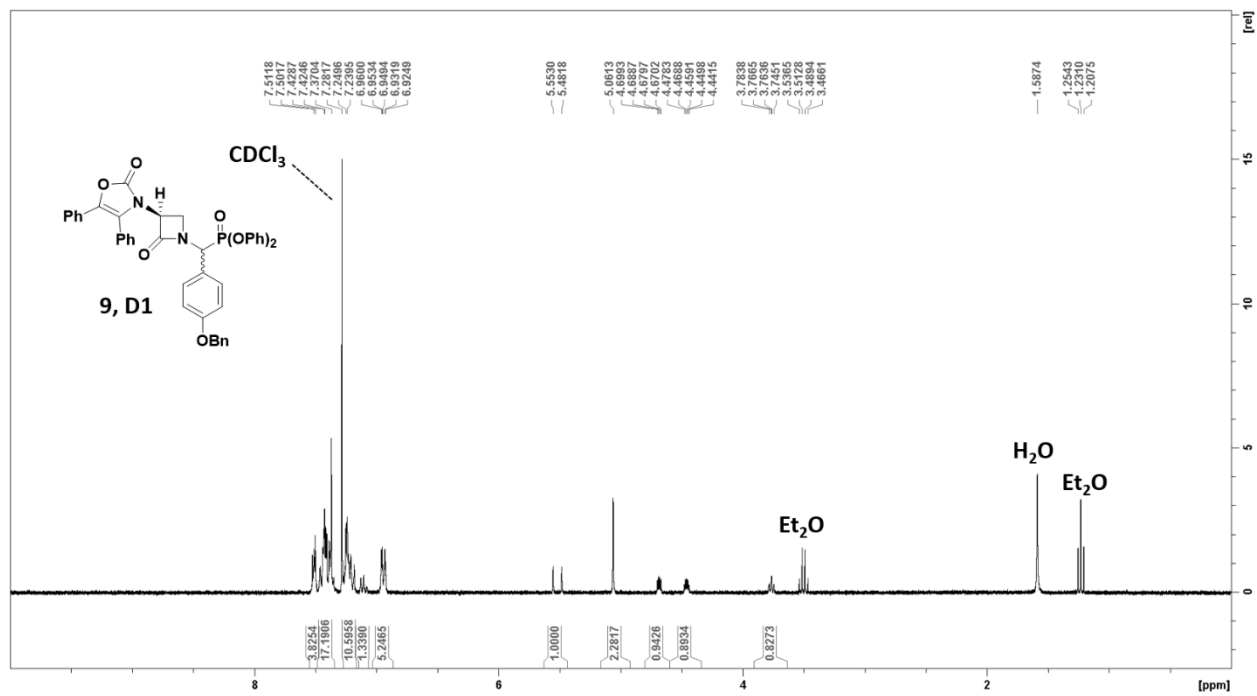

<sup>1</sup>H NMR of **9**, diastereomer 1 (D1) in CDCl<sub>3</sub>.

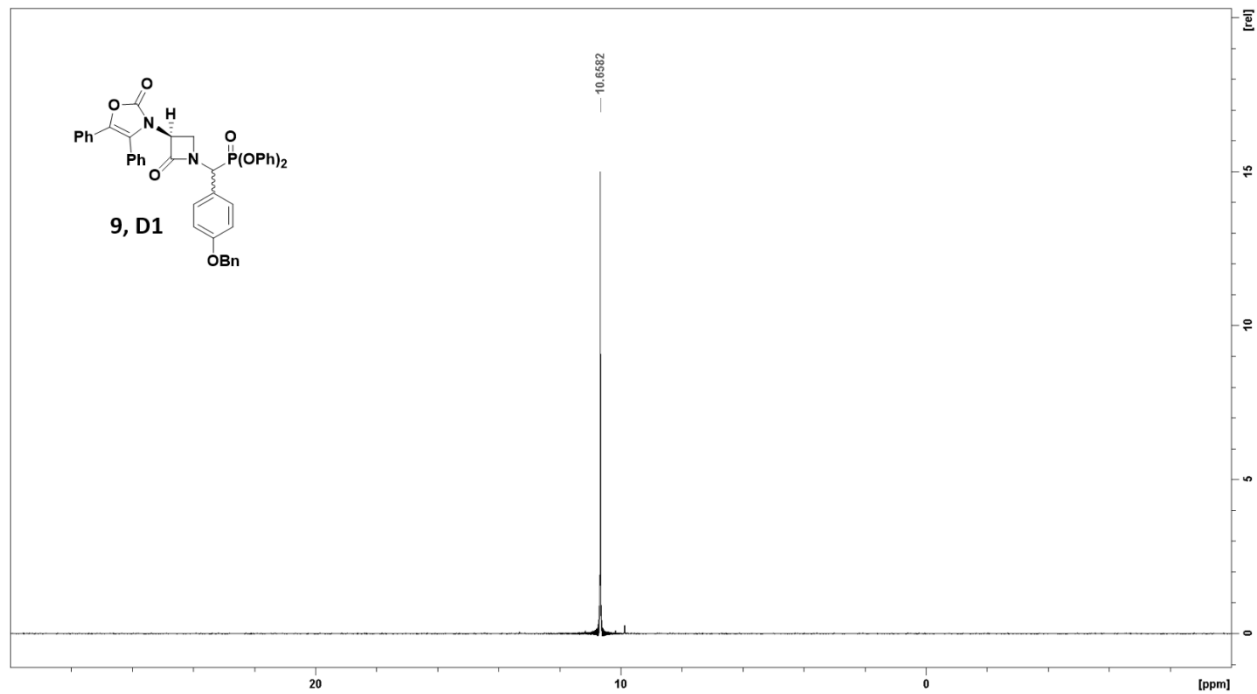

<sup>31</sup>P NMR of **9**, diastereomer 1 (D1) in CDCl<sub>3</sub>.

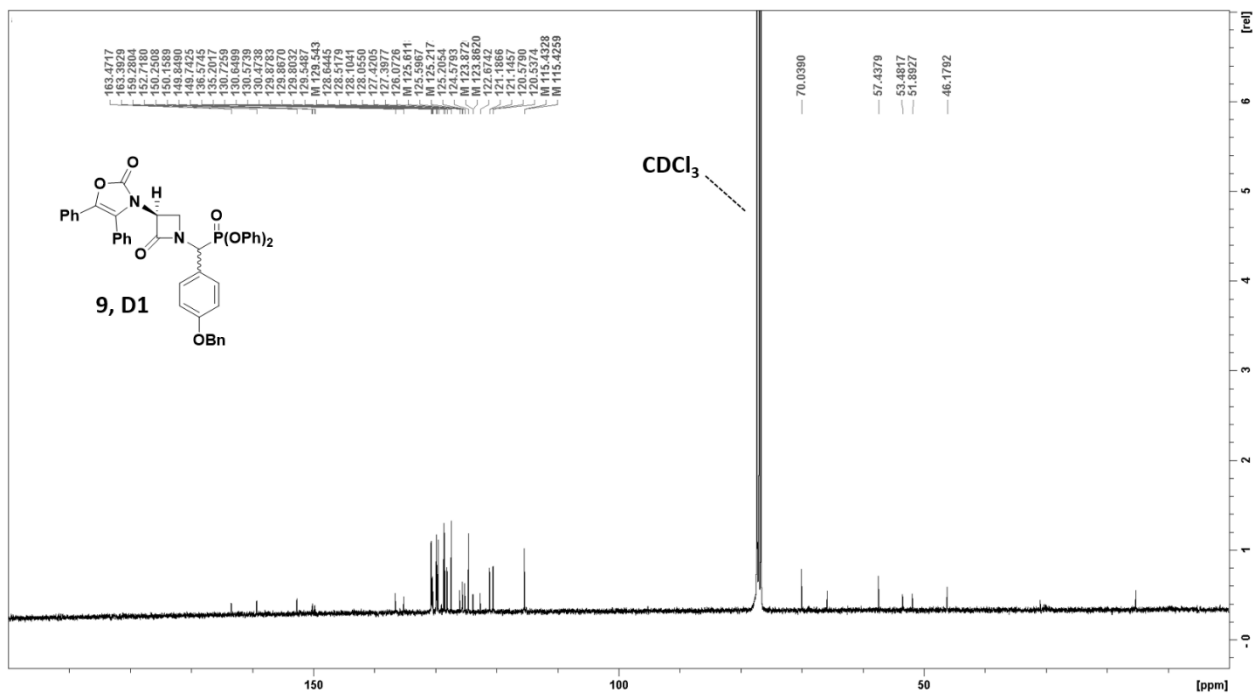

<sup>13</sup>C NMR of 9, diastereomer 1 (D1) in CDCl<sub>3</sub>.

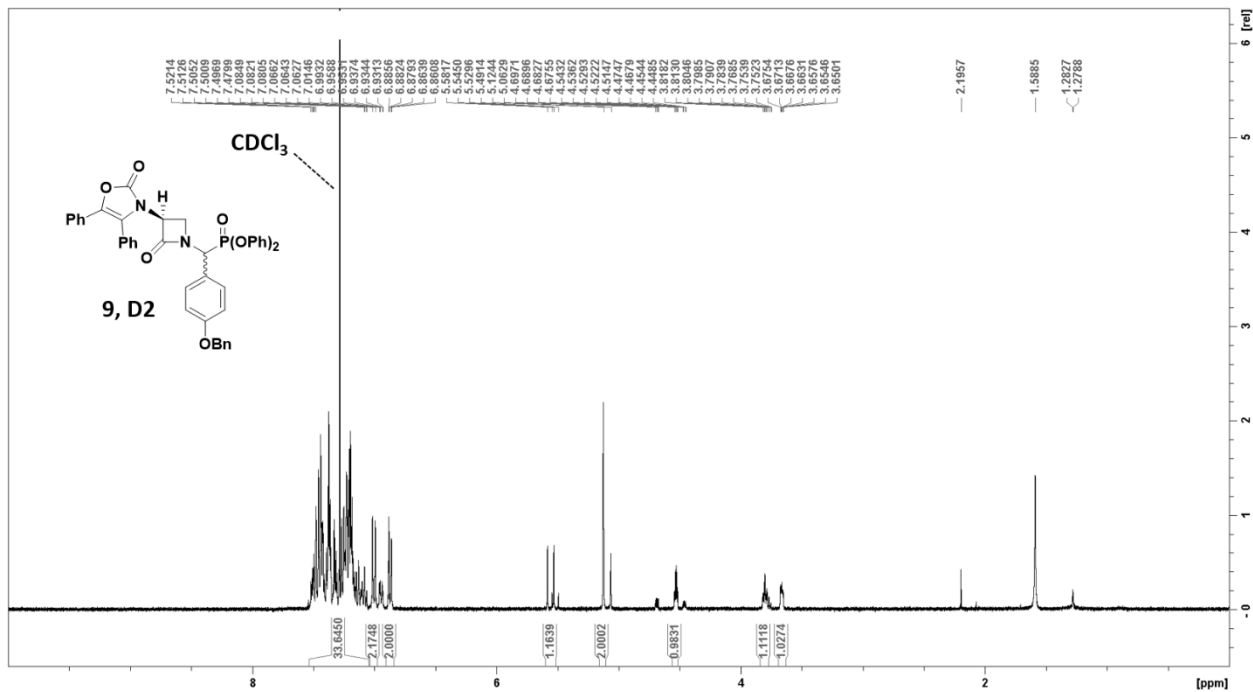

<sup>1</sup>H NMR of 9, diastereomer 2 (D2) enriched ~5:1 in CDCl<sub>3</sub>.

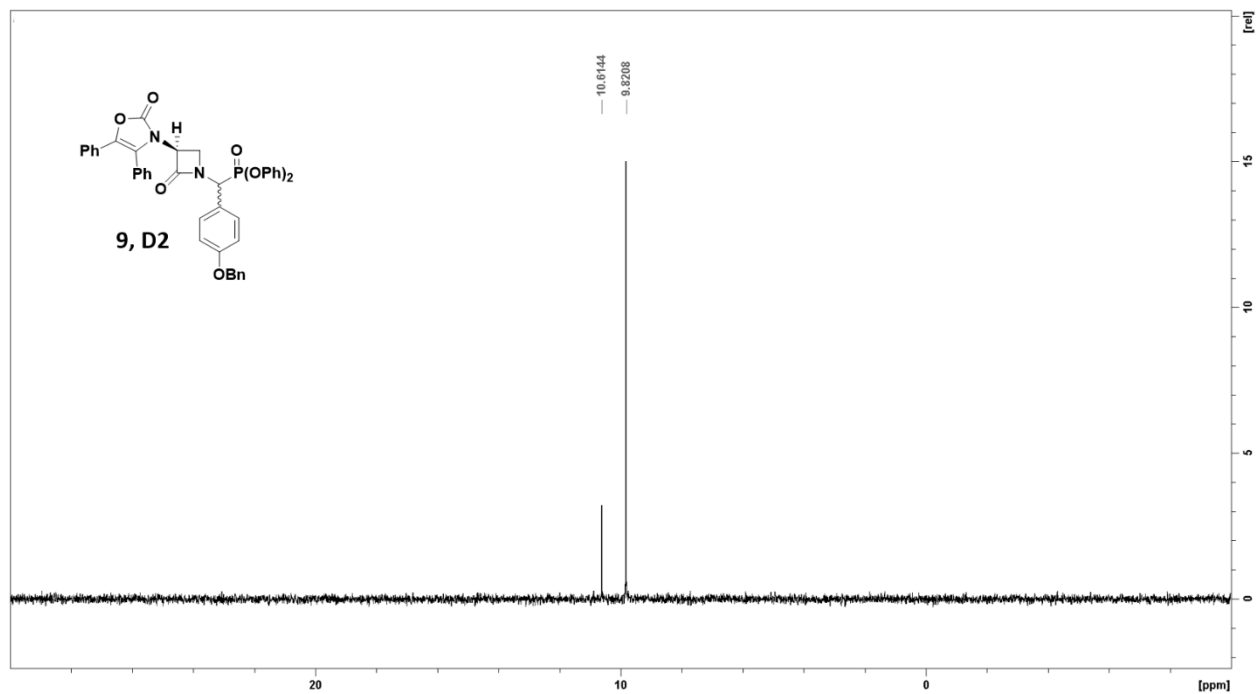

<sup>31</sup>P NMR of **9**, diastereomer 2 (D2) enriched ~5:1 in CDCl<sub>3</sub>.

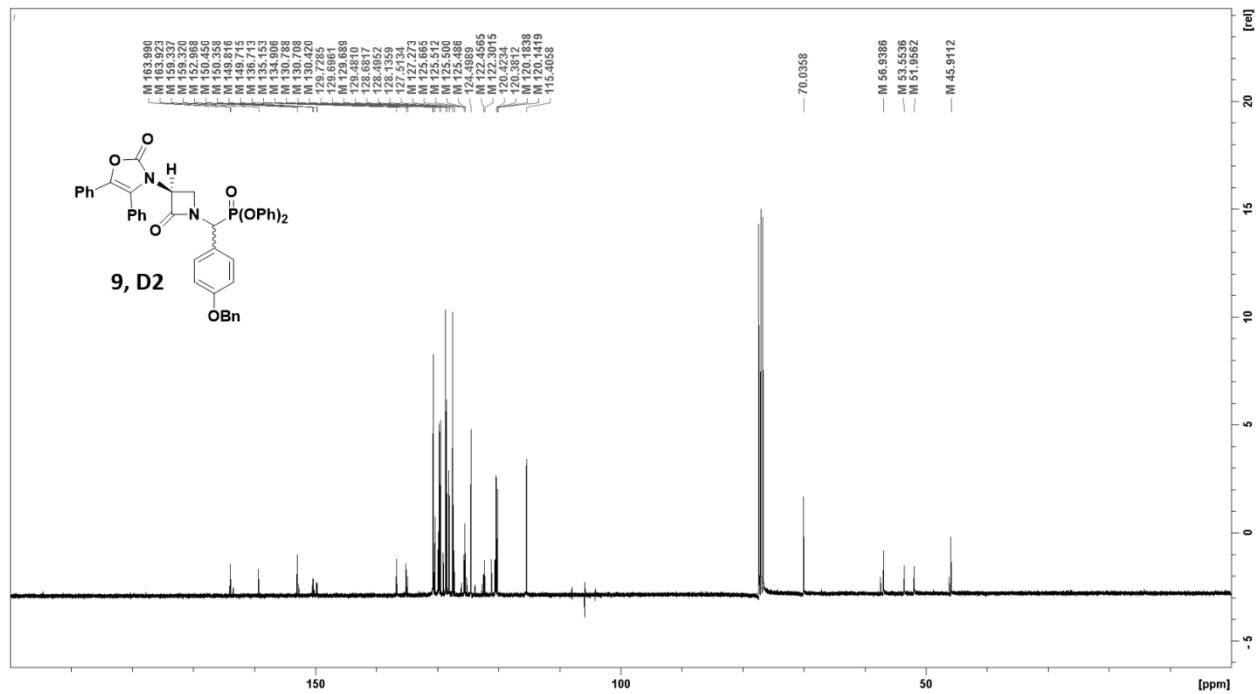

<sup>13</sup>C NMR of **9**, diastereomer 2 (D2) enriched ~5:1 in CDCl<sub>3</sub>.

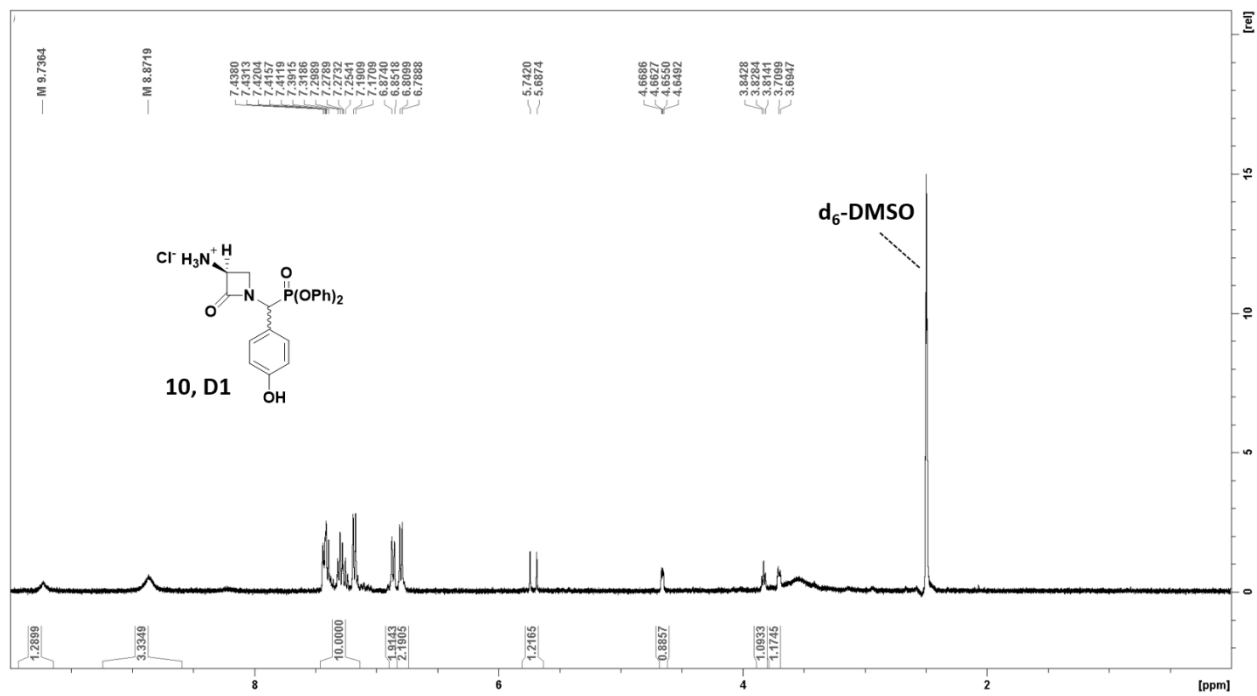

<sup>1</sup>H NMR of **10**, diastereomer 1 (D1) in d<sub>6</sub>-DMSO.

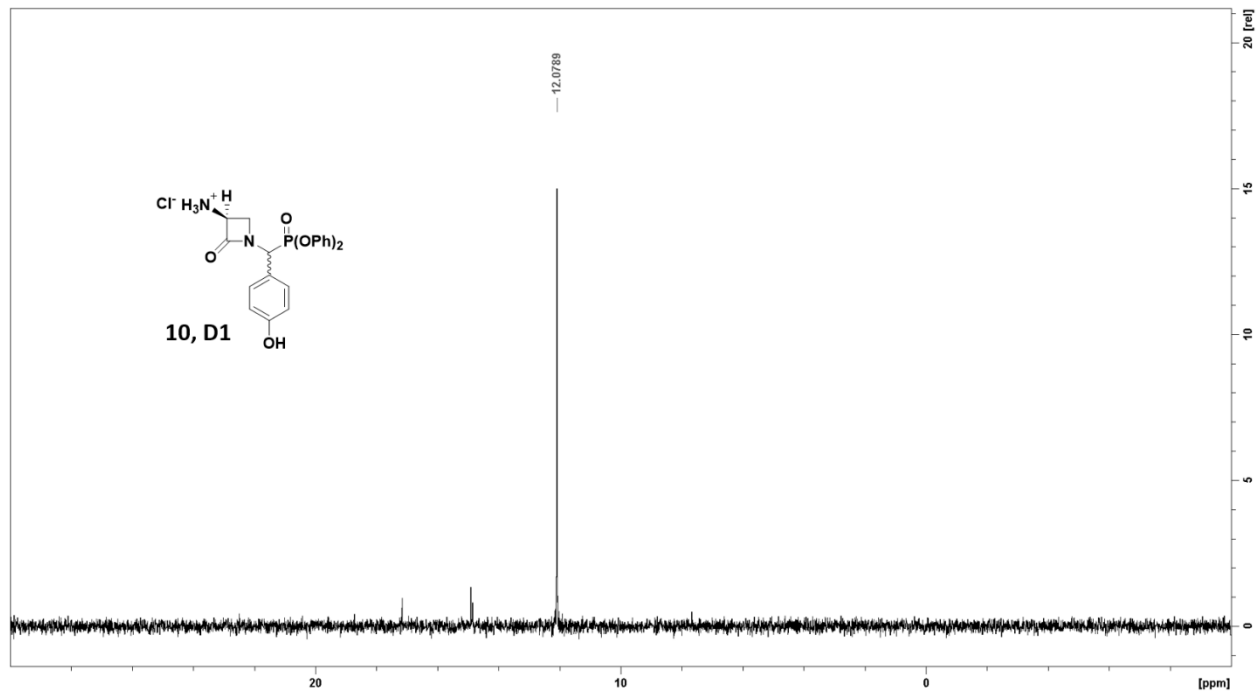

<sup>31</sup>P NMR of **10**, diastereomer 1 (D1) in d<sub>6</sub>-DMSO.



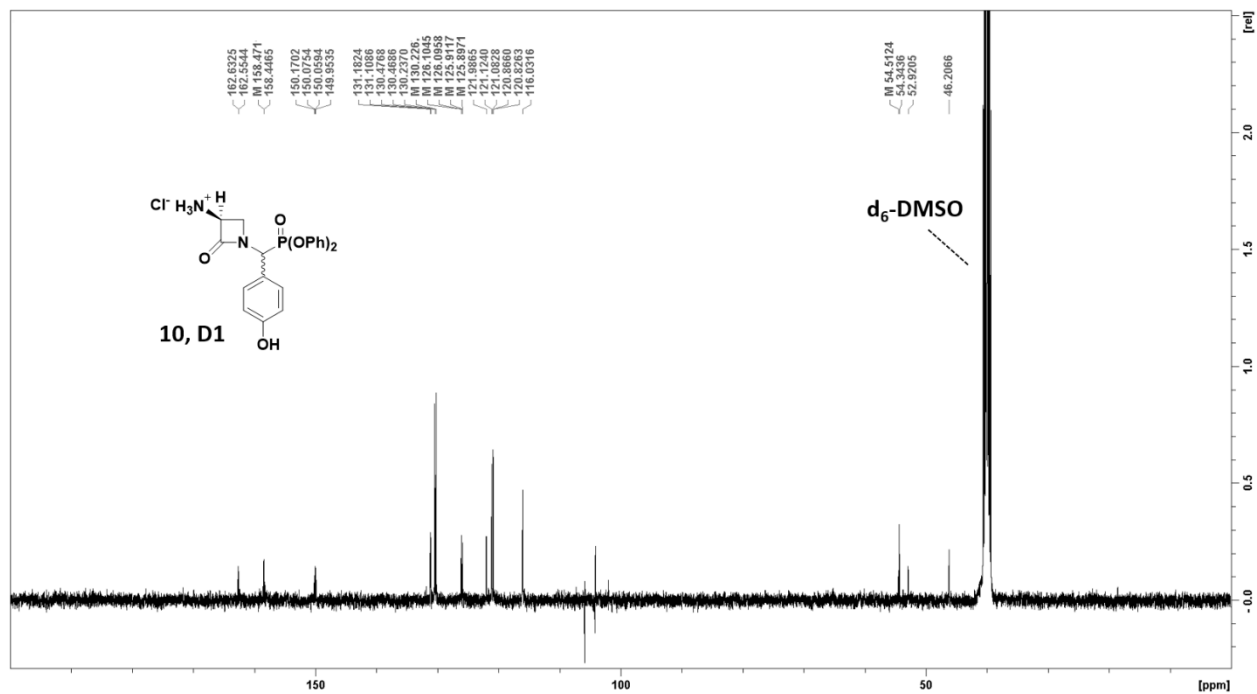

<sup>13</sup>C NMR of **10**, diastereomer 1 (D1) in d<sub>6</sub>-DMSO.

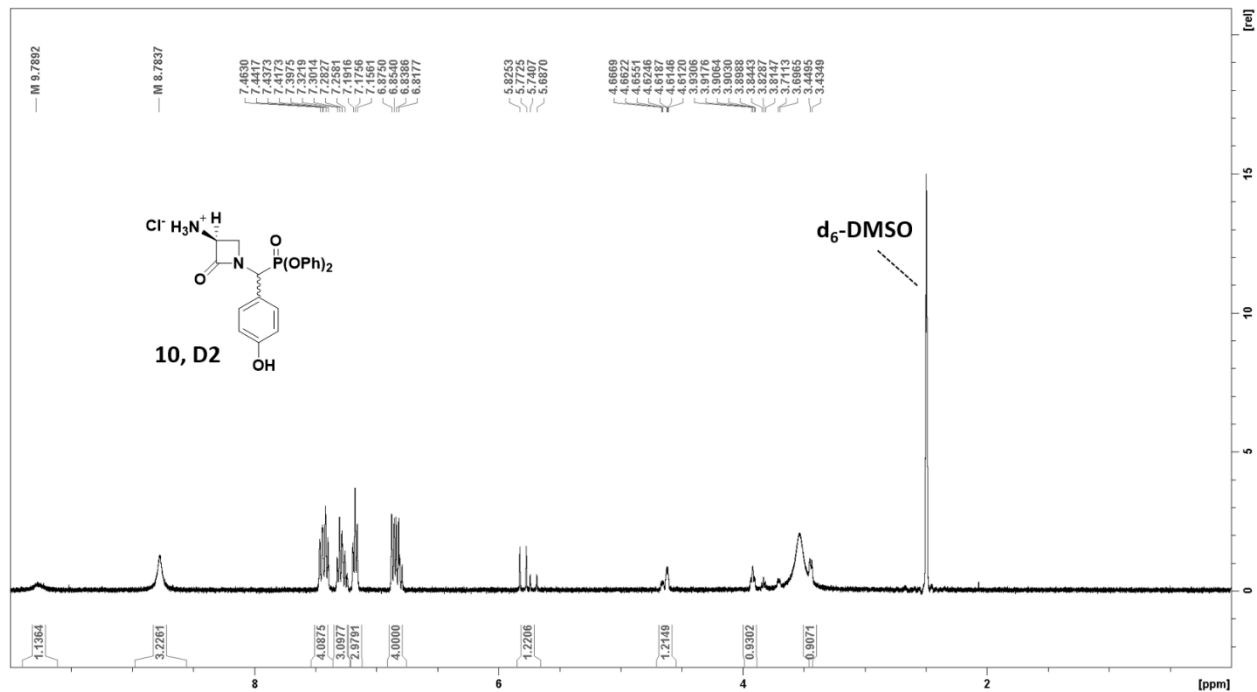

<sup>1</sup>H NMR of **10**, diastereomer 2 (D2) enriched ~3:1 in d<sub>6</sub>-DMSO.

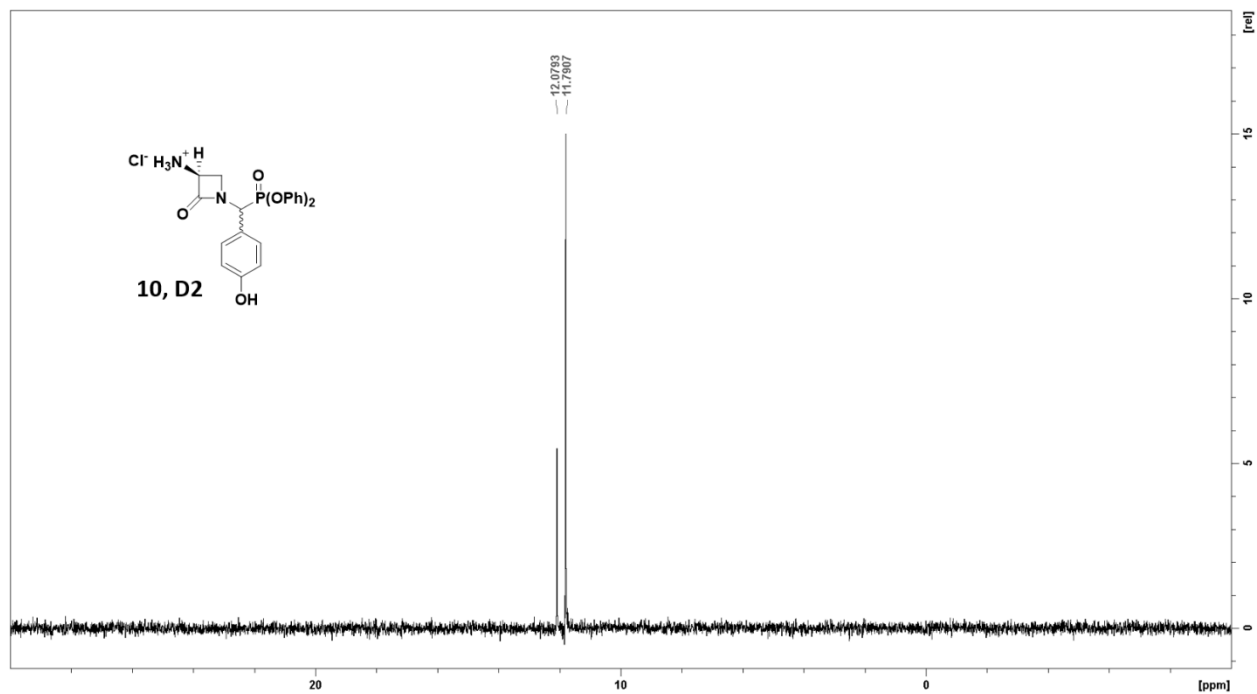

<sup>31</sup>P NMR of **10**, diastereomer 2 (D2) enriched ~3:1 in d<sub>6</sub>-DMSO.

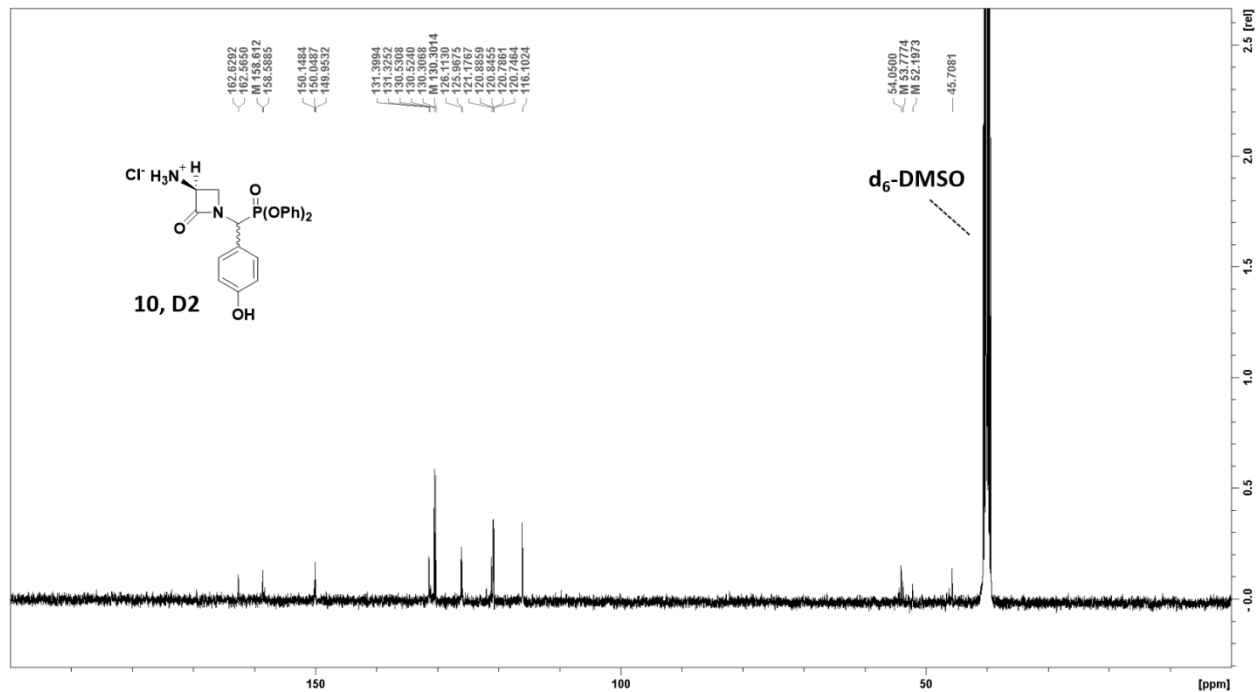

<sup>13</sup>C NMR of **10**, diastereomer 2 (D2) enriched ~3:1 in d<sub>6</sub>-DMSO.

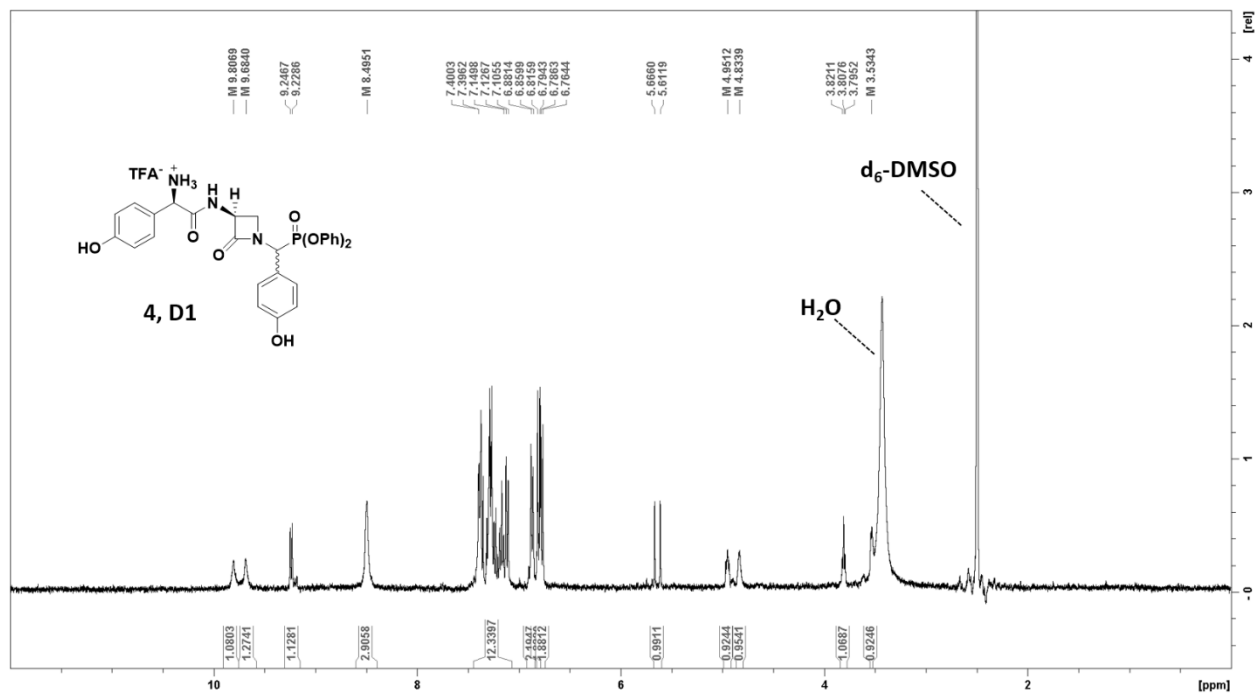

<sup>1</sup>H NMR of **4**, diastereomer 1 (D1) in d<sub>6</sub>-DMSO.

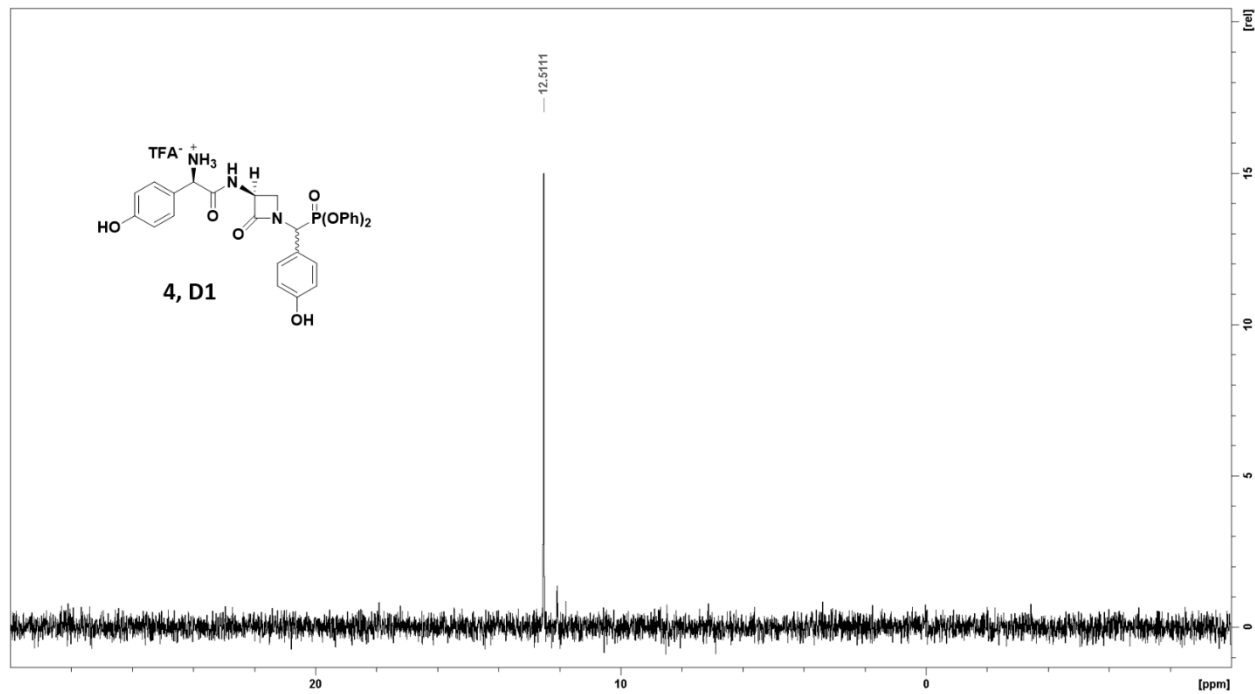

<sup>31</sup>P NMR of **4**, diastereomer 1 (D1) in d<sub>6</sub>-DMSO.

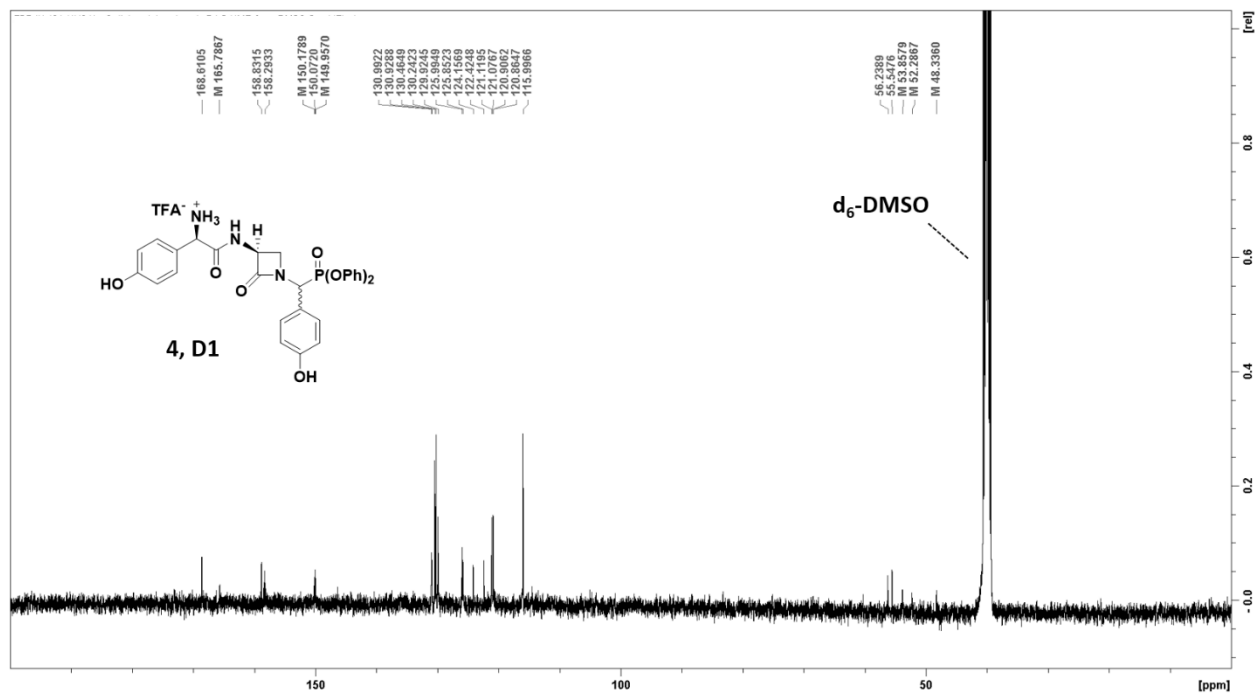

<sup>13</sup>C NMR of 4, diastereomer 1 (D1) in d<sub>6</sub>-DMSO.

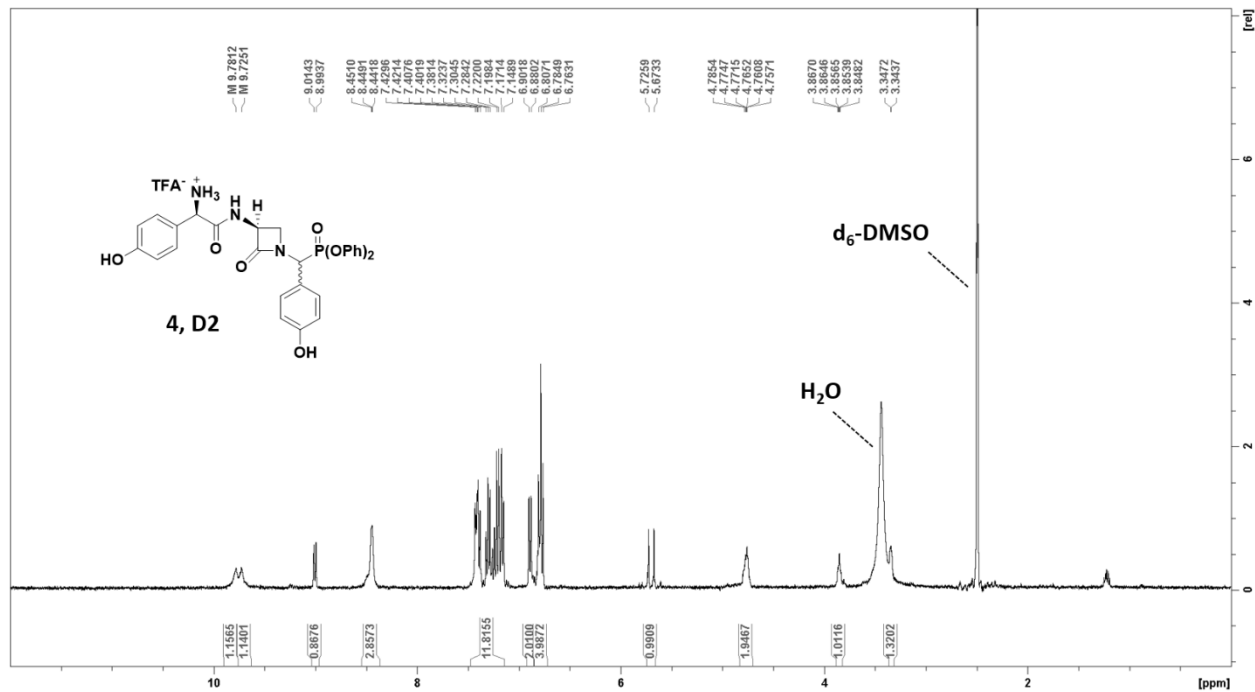

<sup>1</sup>H NMR of 4, diastereomer 2 (D2) in d<sub>6</sub>-DMSO.

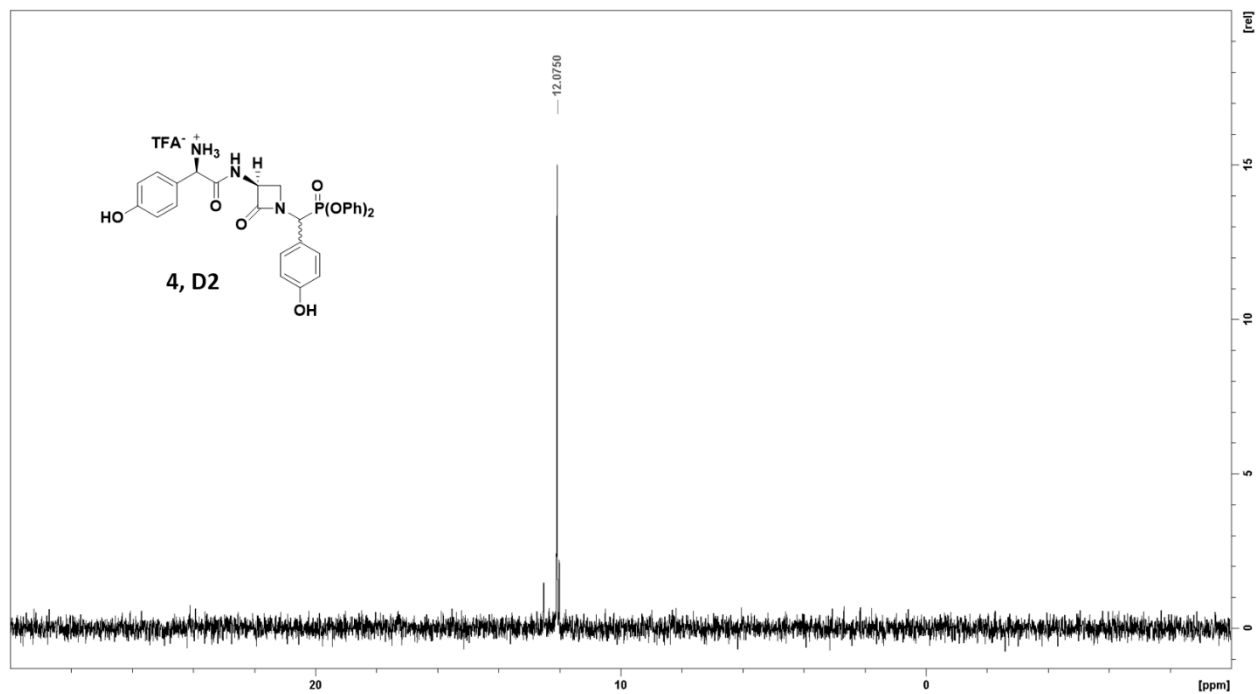

<sup>31</sup>P NMR of **4**, diastereomer 2 (D2) in d<sub>6</sub>-DMSO.

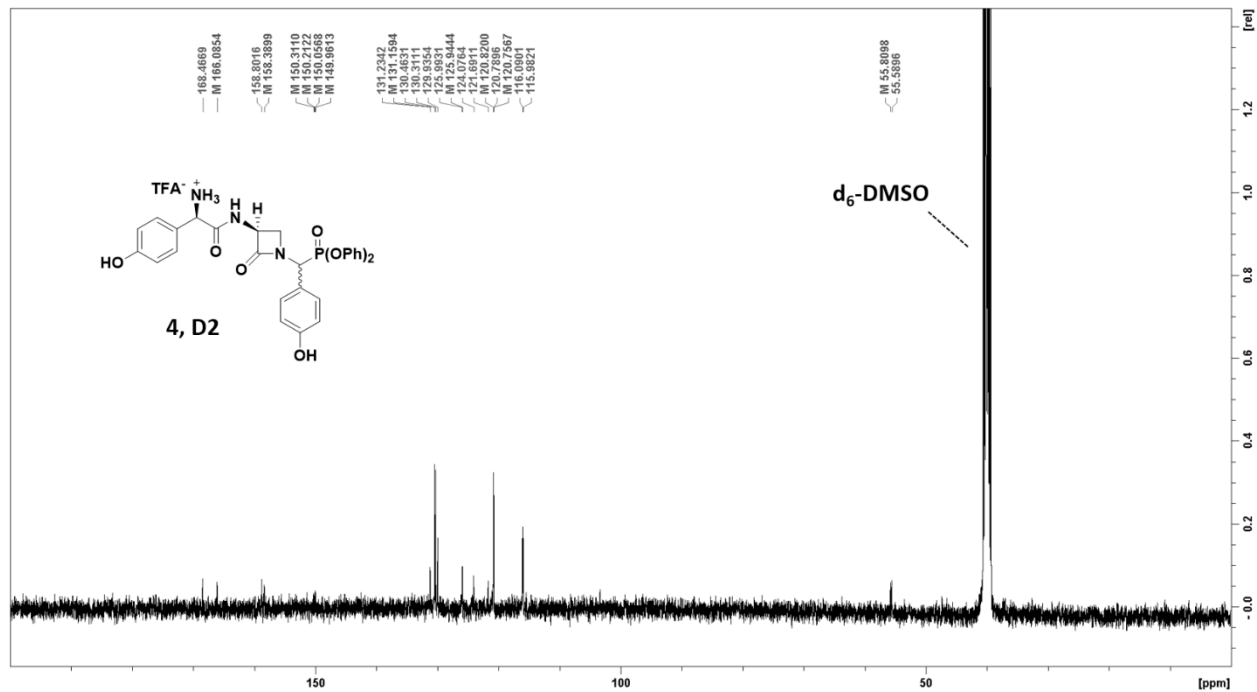

<sup>13</sup>C NMR of **4**, diastereomer 2 (D2) in d<sub>6</sub>-DMSO. Unaccounted for <sup>13</sup>C-signals were acquired with a DEPT-135 experiment (see Figure S34).

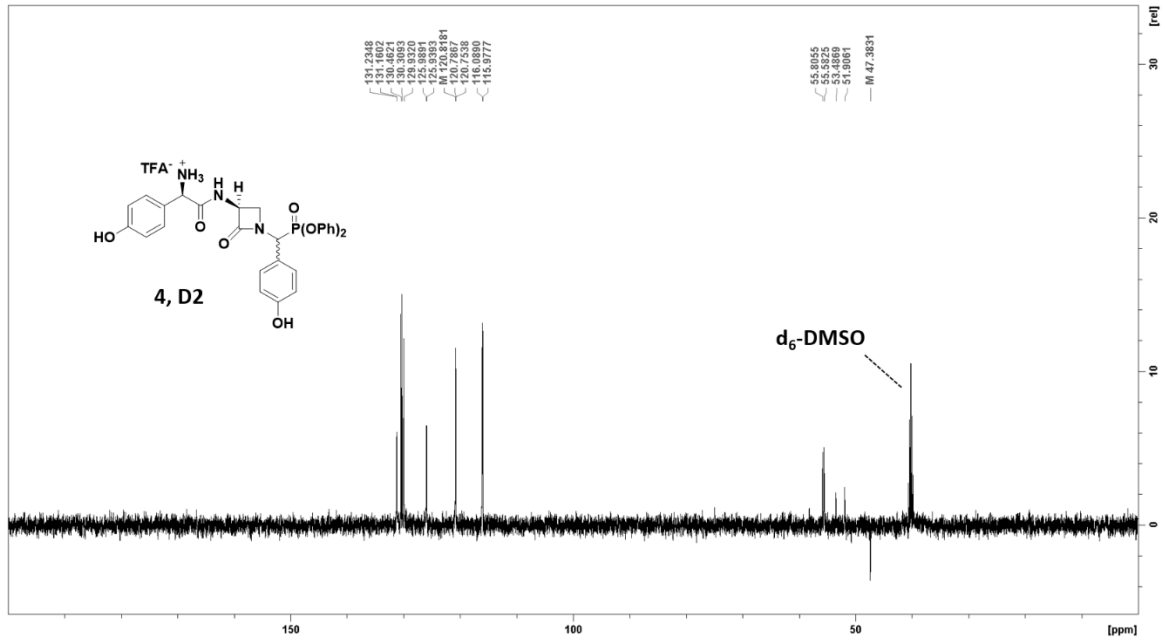

<sup>13</sup>C DEPT-135 of 4, diastereomer 2 (D2) in d<sub>6</sub>-DMSO.

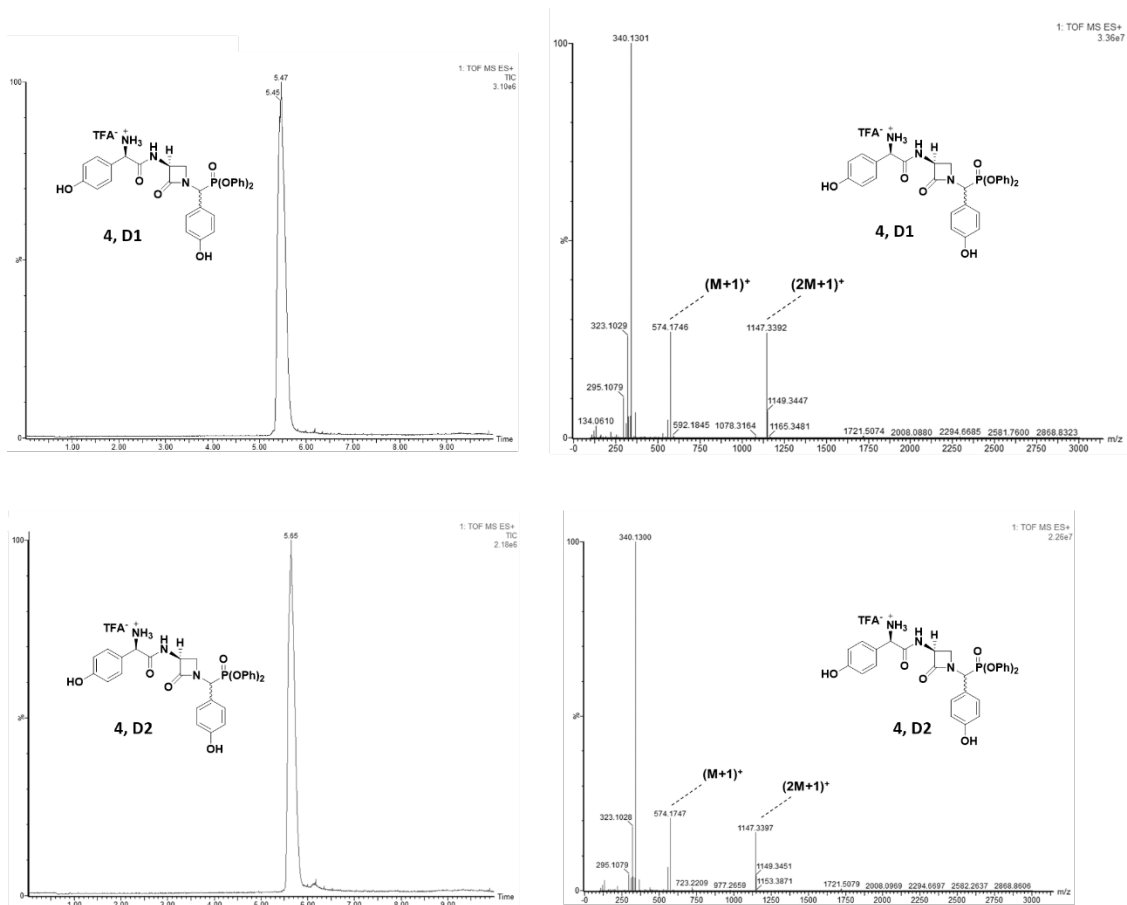

UPLC-HRMS analysis of **4**. (Left) UPLC trace of **4**, diastereomers 1 and 2 (D1 and D2). (Right) Mass spectra of **4**, diastereomers 1 and 2 (D1 and D2).

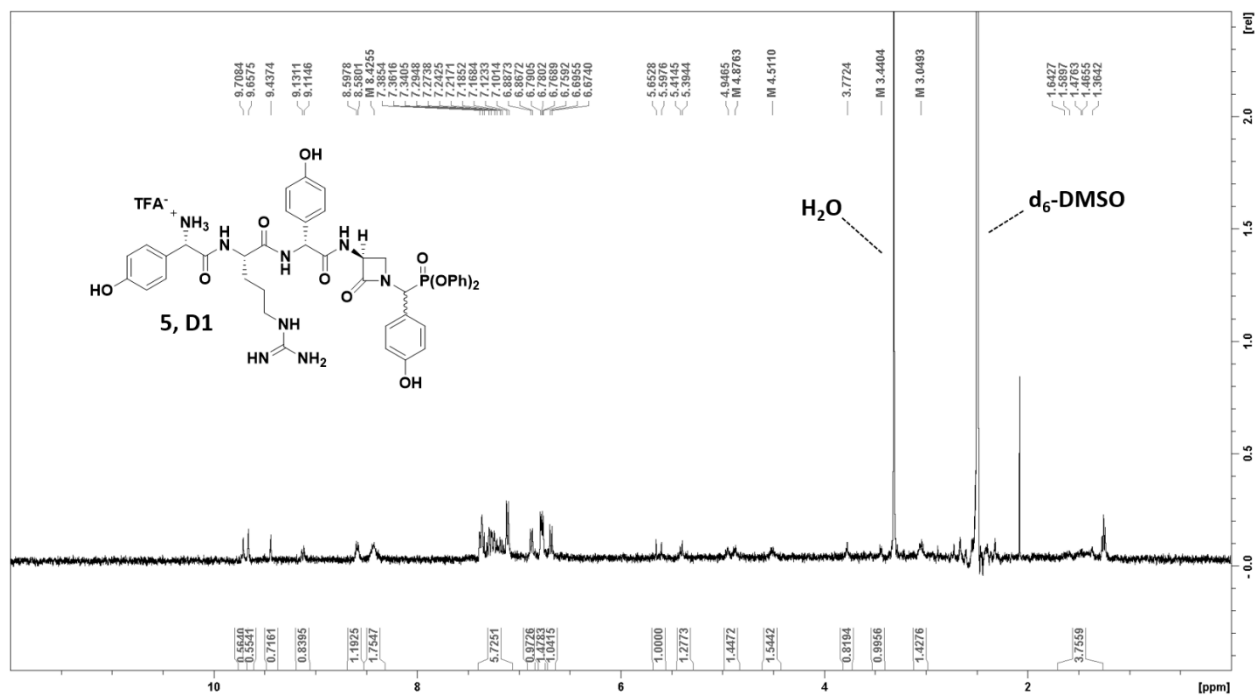

<sup>1</sup>H NMR of **5**, diastereomer 1 (D1) in d<sub>6</sub>-DMSO.

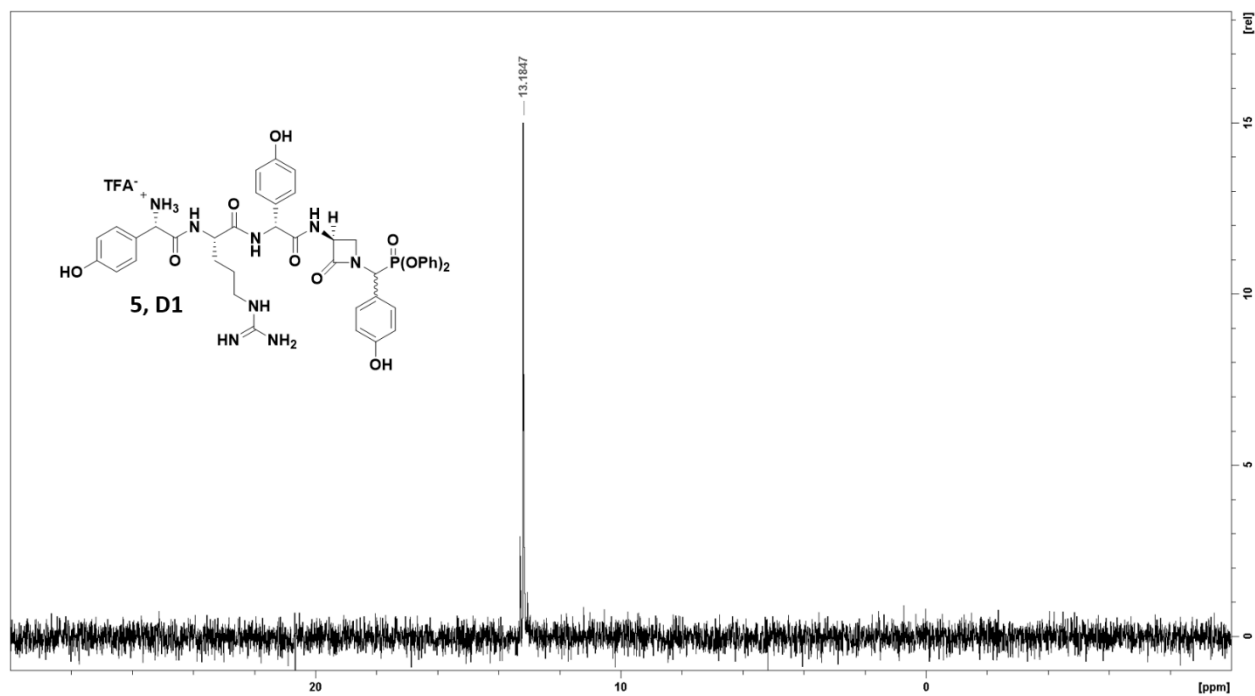

<sup>31</sup>P NMR of **5**, diastereomer 1 (D1) in d<sub>6</sub>-DMSO.

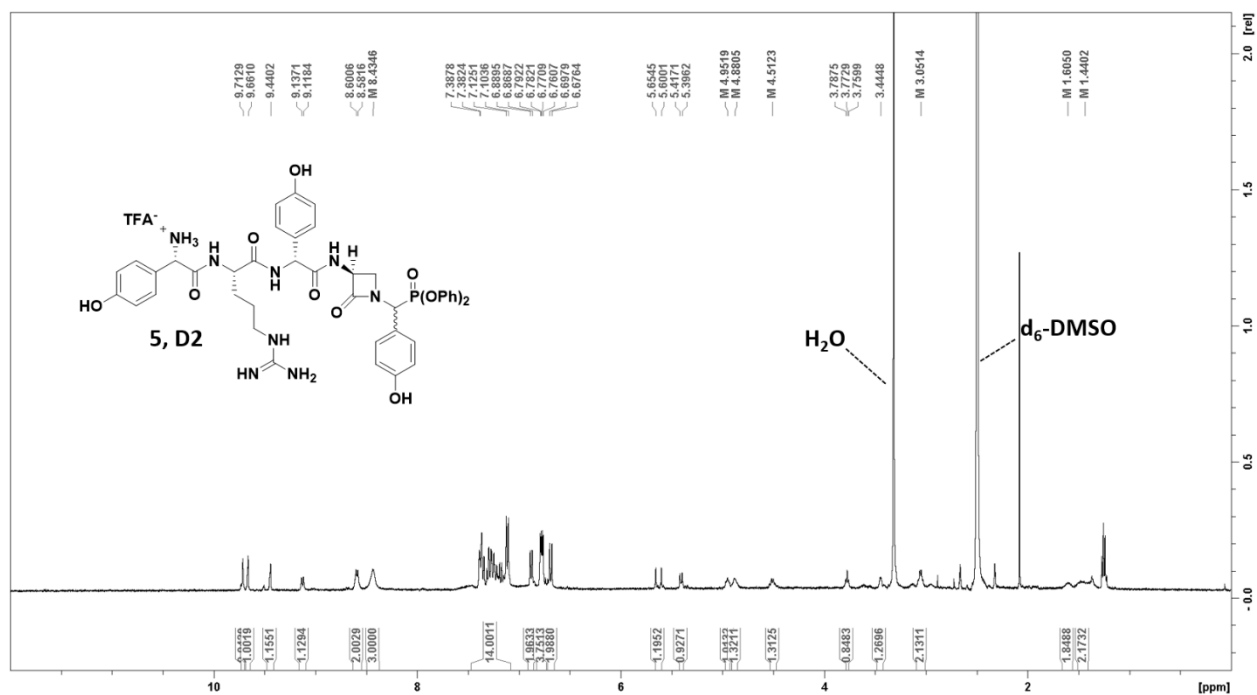

<sup>1</sup>H NMR of 5, diastereomer 2 (D2) in d<sub>6</sub>-DMSO.

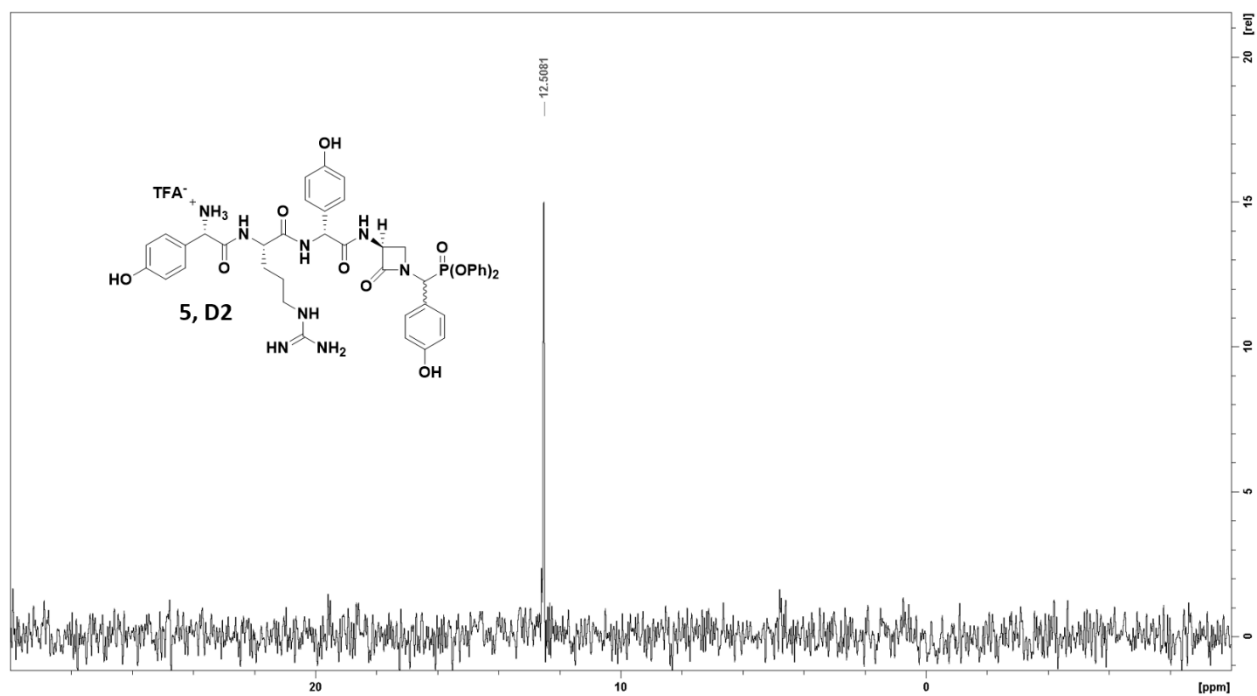

<sup>31</sup>P NMR of 5, diastereomer 2 (D2) in d<sub>6</sub>-DMSO.



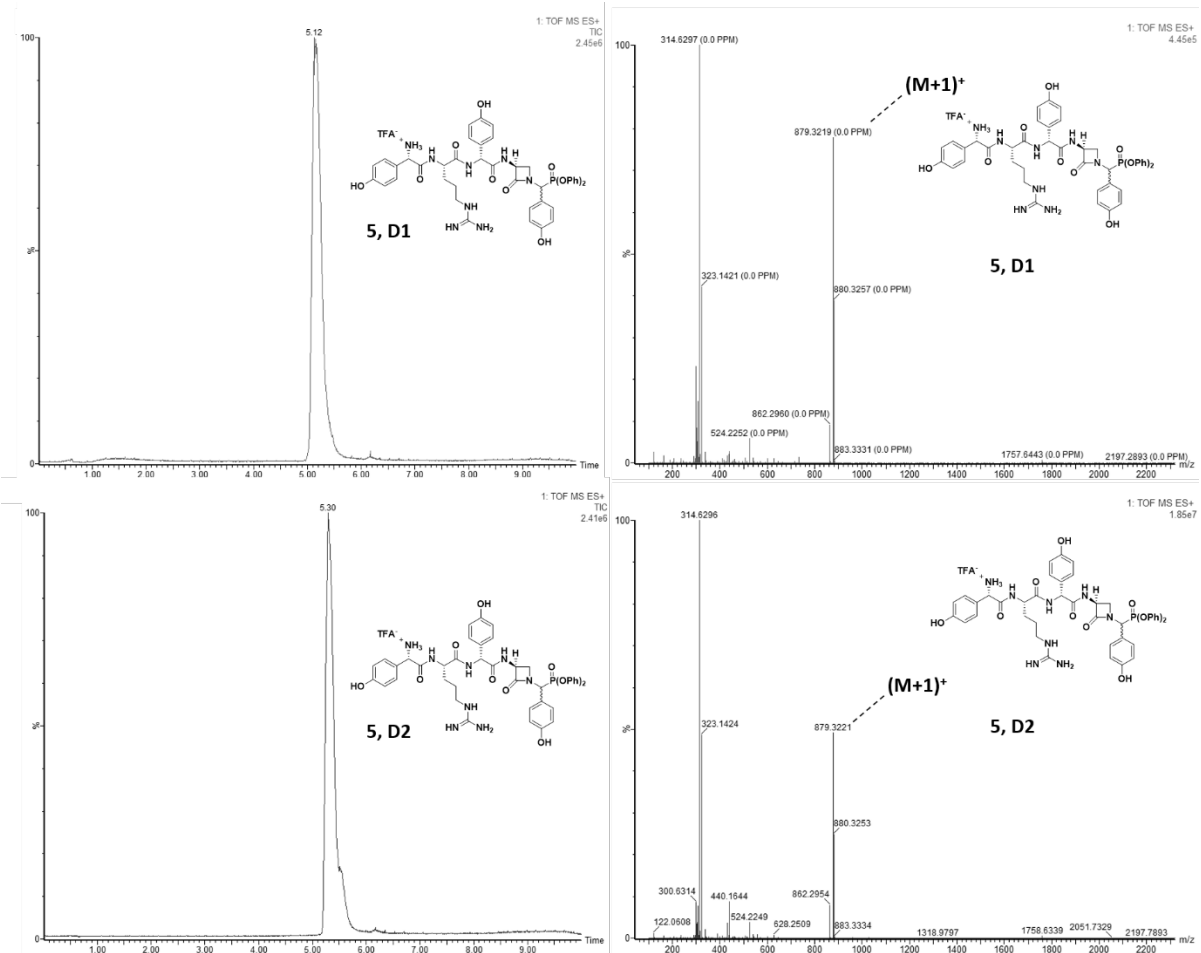

UPLC-HRMS analysis of **5**. (Left) UPLC trace of **5**, diastereomers 1 and 2 (D1 and D2). (Right) Mass spectra of **5**, diastereomers 1 and 2 (D1 and D2).

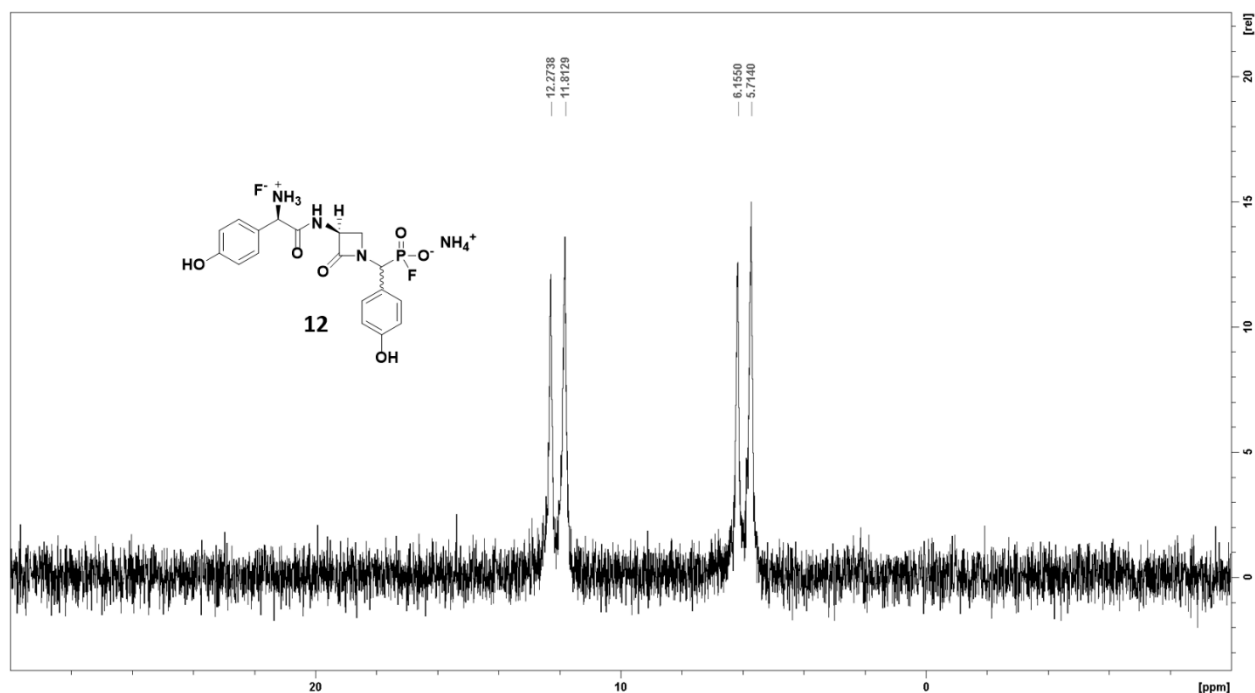

$^{31}\text{P}$  NMR of **12** as a ~1:1 diastereomeric mixture. Characterization by  $^1\text{H}$  and  $^{19}\text{F}$  NMR was impeded by dramatic line broadening likely due to multiple charge-states and slow ion-pair exchange.

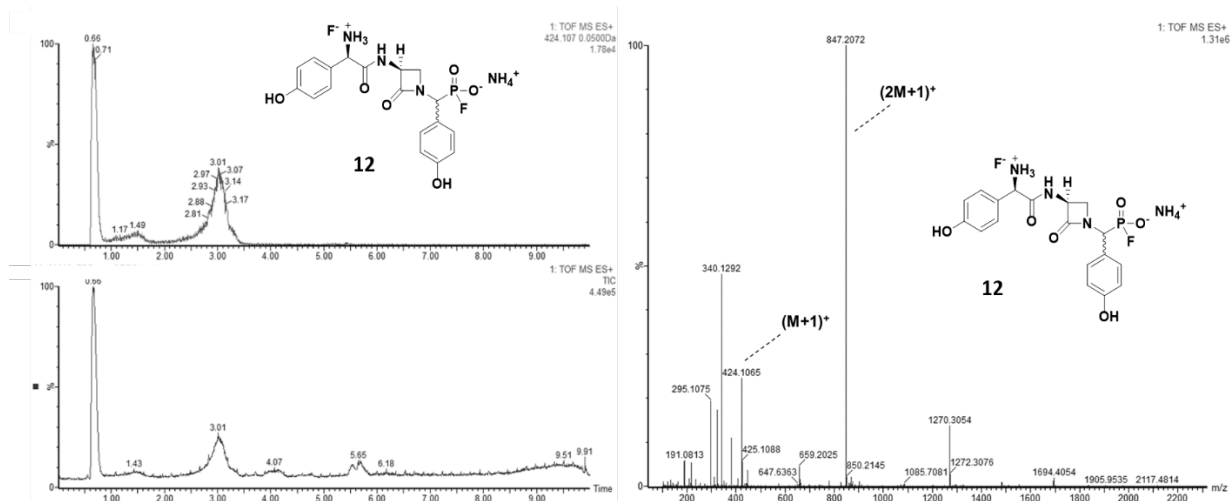

UPLC-HRMS analysis of **12** (~1:1 diastereomeric mixture). (Left, Bottom) UPLC trace of **12**. (Left, Top) Extracted ion chromatogram (EIC) of **12**,  $m/z = 424.107 \pm 0.05$ , indicating that the free fluorophosphonate elutes at different retention times, likely due to differences between diastereomers and different protonation-states. (Right) Mass spectrum of **12**.

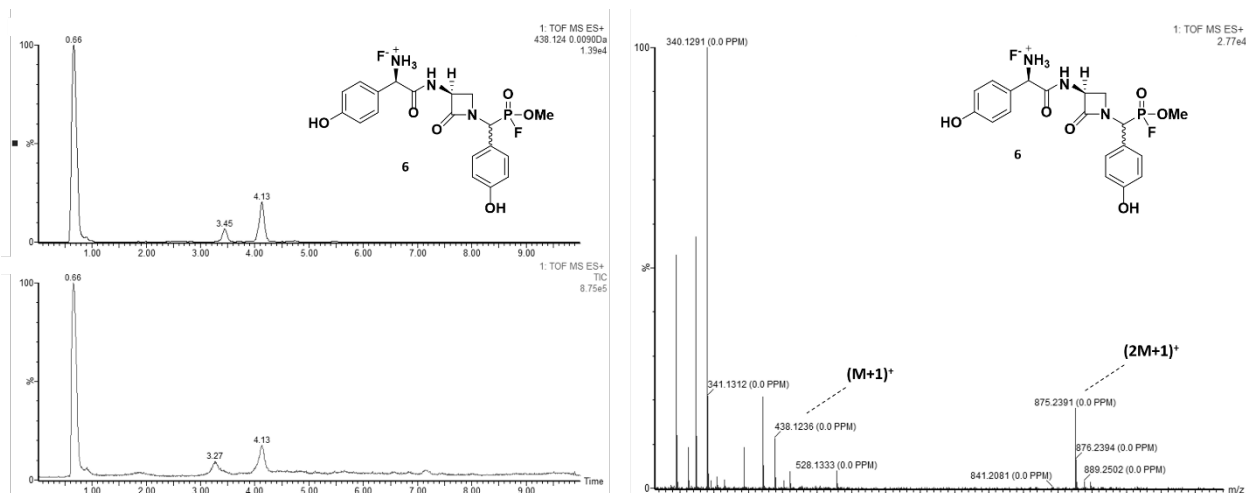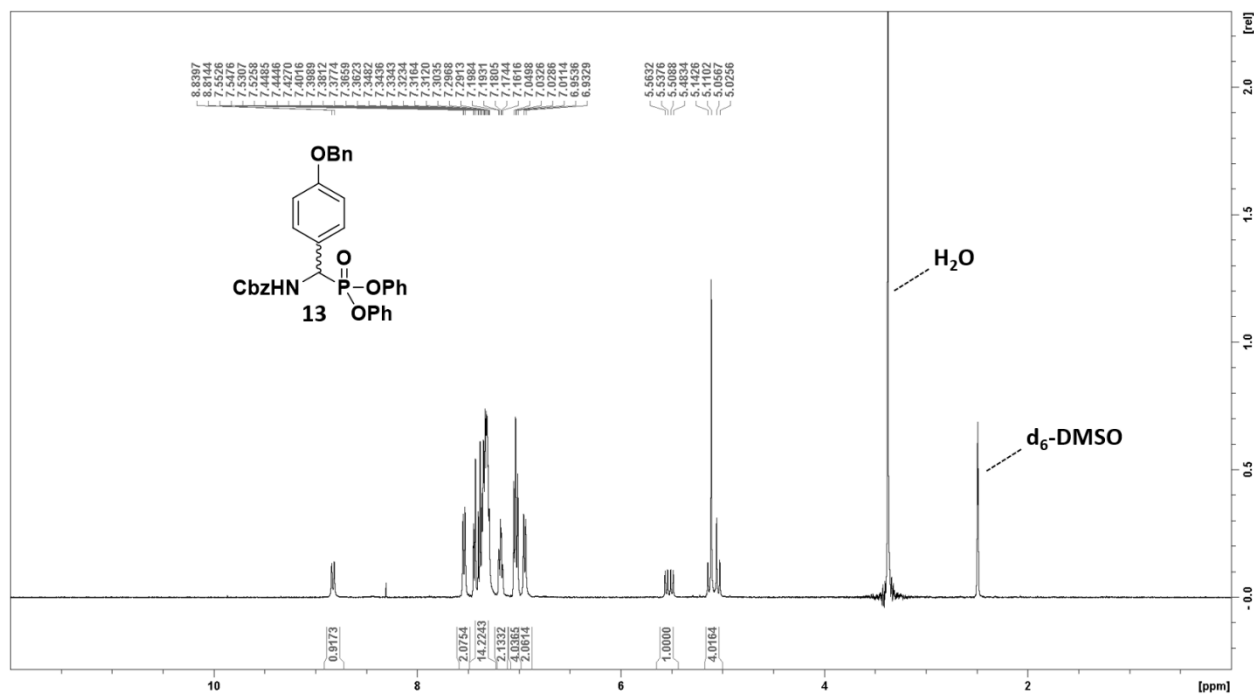

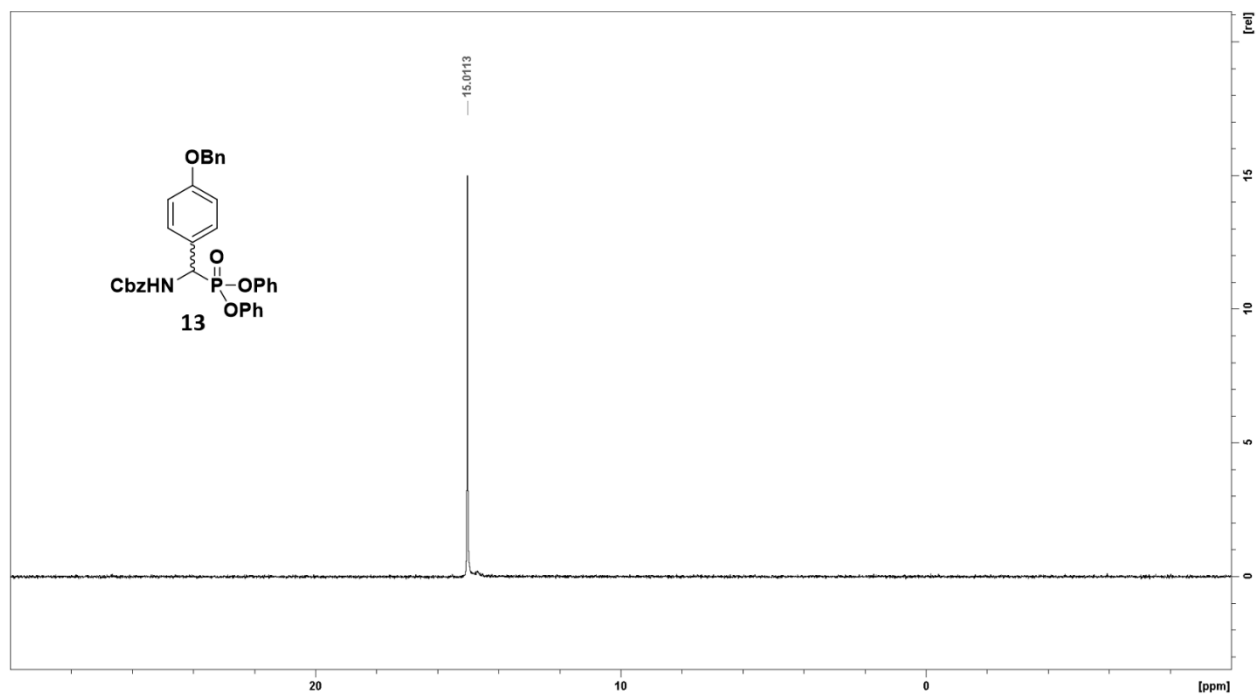

Figure 38.  $^{31}\text{P}$  NMR of racemic **13** in  $\text{d}_6$ -DMSO.

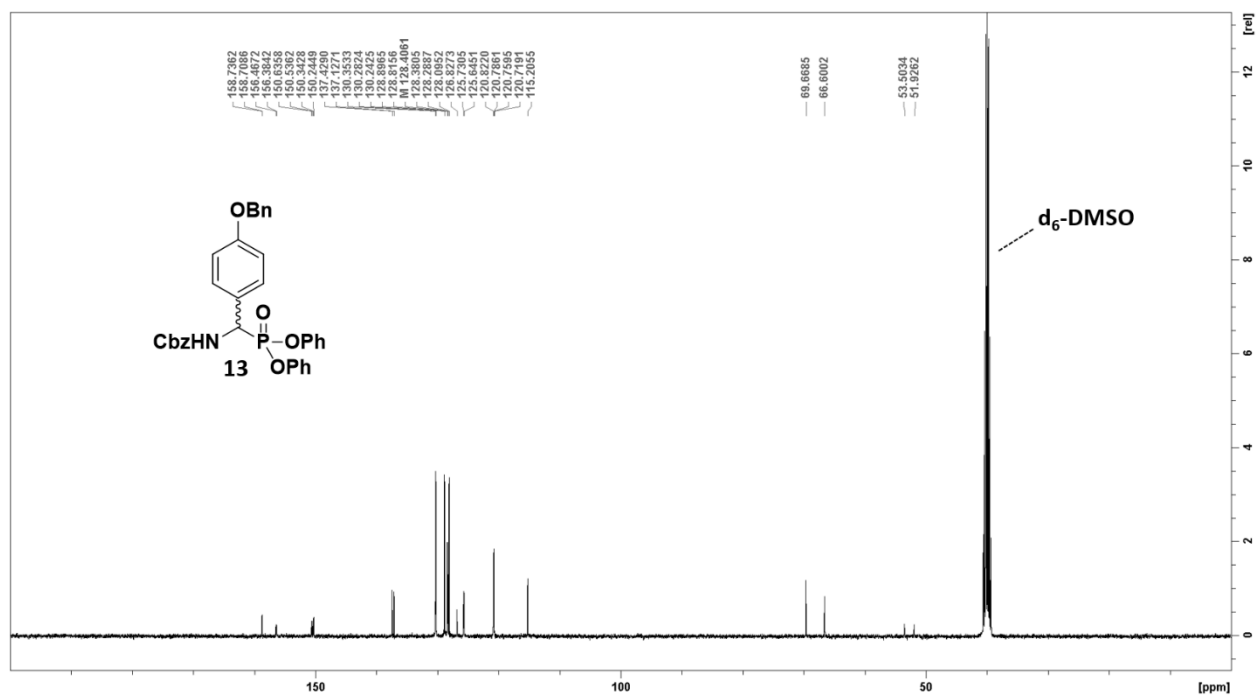

Figure 39.  $^{13}\text{C}$  NMR of racemic **13** in  $\text{d}_6$ -DMSO.
